# Supplementary material for: A near complete genome assembly of chia assists in identification of key fatty acid desaturases in developing seeds
Source: Front Plant Sci. 2023 Mar 20;14:1102715. doi: 10.3389/fpls.2023.1102715 (PMC10067618; doi:10.3389/fpls.2023.1102715)
Supplement: Supplementary file 3 [file Table_4.xlsx]

## Sheet: Sheet1
Supplemental Table 4. List of identified genes involved in "lipid biosynthesis proteins [BR:ko01004]" in Arabidopsis thaliana (Ath), Solanum lycopersicum (Sly), Antirrhinum majus (Ama), Tetona grandis (Tgr), Callicarpa americana (Cam), Jacaranda mimosifolia (Jmi), Salvia splendens (Ssp) and Salvia hispanica (Shi).
KO	Ath	Sly	Ama	Tgr	Cam	Jmi	Sbo	Smi	Ssp	Shi	symbol	name
K00059	6	5	3	5	5	6	4	5	9	6	fabG, OAR1	3-oxoacyl-[acyl-carrier protein] reductase [EC:1.1.1.100]
K00142	1	1	1	1	1	1	1	1	2	1	AASDH	acyl-CoA synthetase [EC:6.2.1.-]
K00208	1	2	3	3	3	3	2	2	6	3	fabI	enoyl-[acyl-carrier protein] reductase I [EC:1.3.1.9 1.3.1.10]
K00507	9	1	1	3	1	1	3	1	5	3	SCD, desC	stearoyl-CoA desaturase (Delta-9 desaturase) [EC:1.14.19.1]
K00630	1	1	1	2	2	2	0	1	4	2	ATS1	glycerol-3-phosphate O-acyltransferase [EC:2.3.1.15]
K00645	1	1	1	2	1	1	1	1	2	2	fabD, MCAT, MCT1	[acyl-carrier-protein] S-malonyltransferase [EC:2.3.1.39]
K00648	1	2	1	2	2	2	2	2	4	2	fabH	3-oxoacyl-[acyl-carrier-protein] synthase III [EC:2.3.1.180]
K00655	1	1	1	2	2	2	1	1	3	2	plsC	1-acyl-sn-glycerol-3-phosphate acyltransferase [EC:2.3.1.51]
K01068	2	2	1	2	1	1	2	1	3	2	ACOT1_2_4	acyl-coenzyme A thioesterase 1/2/4 [EC:3.1.2.2]
K01074	7	3	2	4	5	3	1	2	6	3	PPT	palmitoyl-protein thioesterase [EC:3.1.2.22]
K01895	1	2	1	1	1	1	1	1	3	2	ACSS1_2, acs	acetyl-CoA synthetase [EC:6.2.1.1]
K01897	11	10	11	9	9	10	7	9	19	11	ACSL, fadD	long-chain acyl-CoA synthetase [EC:6.2.1.3]
K01913	1	2	3	2	2	2	3	2	4	2	AAE7, ACN1	acetate/butyrate---CoA ligase [EC:6.2.1.1 6.2.1.2]
K02372	2	1	2	2	2	1	1	1	5	3	fabZ	3-hydroxyacyl-[acyl-carrier-protein] dehydratase [EC:4.2.1.59]
K03921	7	9	10	6	9	6	4	10	10	14	FAB2, SSI2, desA1	acyl-[acyl-carrier-protein] desaturase [EC:1.14.19.2 1.14.19.11 1.14.19.26]
K04712	1	1	1	2	2	2	1	2	4	2	DEGS	sphingolipid 4-desaturase/C4-monooxygenase [EC:1.14.19.17 1.14.18.5]
K09458	3	7	9	7	8	7	11	10	24	13	fabF, OXSM, CEM1	3-oxoacyl-[acyl-carrier-protein] synthase II [EC:2.3.1.179]
K10251	2	1	4	5	4	5	3	4	4	3	HSD17B12, KAR, IFA38	17beta-estradiol 17-dehydrogenase / very-long-chain 3-oxoacyl-CoA reductase [EC:1.1.1.62 1.1.1.330]
K10255	1	1	1	1	1	1	1	1	2	1	FAD6, desA	acyl-lipid omega-6 desaturase (Delta-12 desaturase) [EC:1.14.19.23 1.14.19.45]
K10256	1	8	34	2	2	3	2	1	4	2	FAD2	omega-6 fatty acid desaturase / acyl-lipid omega-6 desaturase (Delta-12 desaturase) [EC:1.14.19.6 1.14.19.22]
K10257	3	3	4	3	3	4	4	3	9	4	FAD3, FAD7, FAD8, desB	acyl-lipid omega-3 desaturase [EC:1.14.19.25 1.14.19.35 1.14.19.36]
K10258	1	1	2	1	1	1	0	1	2	3	TER, TSC13, CER10	very-long-chain enoyl-CoA reductase [EC:1.3.1.93]
K10703	2	3	4	3	2	2	2	3	4	2	HACD, PHS1, PAS2	very-long-chain (3R)-3-hydroxyacyl-CoA dehydratase [EC:4.2.1.134]
K10781	1	3	4	4	5	3	5	4	11	6	FATB	fatty acyl-ACP thioesterase B [EC:3.1.2.14 3.1.2.21]
K10782	2	1	4	1	1	1	1	1	3	2	FATA	fatty acyl-ACP thioesterase A [EC:3.1.2.14]
K13506	1	1	2	1	1	2	2	1	2	1	GPAT3_4, AGPAT9, AGPAT6	glycerol-3-phosphate O-acyltransferase 3/4 [EC:2.3.1.15]
K13508	9	8	11	11	15	14	20	15	19	14	GPAT	glycerol-3-phosphate acyltransferase [EC:2.3.1.15 2.3.1.198]
K13510	2	2	3	2	2	2	2	3	8	4	LPCAT1_2	lysophosphatidylcholine acyltransferase / lyso-PAF acetyltransferase [EC:2.3.1.23 2.3.1.67]
K13511	2	2	2	2	2	2	1	2	5	2	TAZ	monolysocardiolipin acyltransferase [EC:2.3.1.-]
K13513	2	2	3	2	2	2	2	2	3	2	LCLAT1, AGPAT8	lysocardiolipin and lysophospholipid acyltransferase [EC:2.3.1.- 2.3.1.51]
K13519	2	3	1	3	2	2	2	2	2	2	LPT1, ALE1	lysophospholipid acyltransferase [EC:2.3.1.51 2.3.1.23 2.3.1.-]
K13523	2	3	3	3	3	3	3	3	6	3	AGPAT3_4	lysophosphatidic acid acyltransferase / lysophosphatidylinositol acyltransferase [EC:2.3.1.51 2.3.1.-]
K17361	2	3	2	3	3	3	2	2	4	3	ACOT9	acyl-coenzyme A thioesterase 9 [EC:3.1.2.-]
K17362	5	6	6	6	3	5	5	5	8	4	ACOT13	acyl-coenzyme A thioesterase 13 [EC:3.1.2.-]
K23618	3	2	1	1	1	1	2	1	3	2	AAE11_12	acyl-activating enzyme 11/12 [EC:6.2.1.2 6.2.1.-]
